# Supplementary material for: Separation and characterization of polyphenolics from underutilized byproducts of fruit production (Choerospondias axillaris peels): inhibitory activity of proanthocyanidins against glycolysis enzymes
Source: Royal Society of Chemistry journal article supplement (doi:10.1039/c5fo00939a), 2015-01-01

## Supplementary material

**Table 1.** UPLC-DAD retention times, characteristic UV/Vis maxima and negative ions in UPLC-ESI-QTOF-MS of grape peel and seed, and *C. axillaris* peels PAs phloroglucinolysis products.

| Peak | Rt(min) | Compound <sup>a</sup>                           | Max(nm)  | [M-H] <sup>-</sup> m/z | Sample                                 |
|------|---------|-------------------------------------------------|----------|------------------------|----------------------------------------|
| 3    | 11.121  | Epigallocatechin - phloroglucinol<br>(EGC-P)    | 232, 271 | 429                    | Grape peel;<br>F2,F3,F4, PPAs          |
| 4    | 26.757  | Catechin - phloroglucinol<br>(C-P)              | 229, 278 | 413                    | Grape peel and seed;<br>F2,F3,F4, PPAs |
| 5    | 27.223  | Epicatechin - phloroglucinol<br>(EC-P)          | 230, 279 | 413                    | Grape peel and seed;<br>F2,F3,F4, PPAs |
| 6    | 28.972  | Catechin<br>(C)                                 | 230, 280 | 289                    | Grape peel and seed;<br>F2,F3,F4, PPAs |
| 7    | 33.581  | Epicatechin<br>(EC)                             | 229, 279 | 289                    | Grape peel and seed;<br>F2,F3,F4, PPAs |
| 8    | 40.767  | Epicatechin gallate - phloroglucinol<br>(ECG-P) | 230, 278 | 565                    | Grape peel and seed;<br>F2,F3,F4, PPAs |
| 9    | 47.104  | Epicatechin gallate<br>(ECG)                    | 231,230  | 441                    | Grape peel and seed;<br>F2,F3,F4, PPAs |

<sup>a</sup>C, EC, EGC and ECG are the abbreviation for catechin, epicatechin, epigallocatechin and epicatechin gallate, respectively; P is the abbreviation for phloroglucinol.

**Figure 1.** ESI-QTOF mass spectrum of extension subunit-phloroglucinol adducts of PAs from *C. axillaris* peels. (a): peak 3 (epigallocatechin-phloroglucinol); (b): peak 4 (catechin-phloroglucinol); (c): peak 5 (epicatechin-phloroglucinol); (d): peak 8 (epicatechin gallate-phloroglucinol).

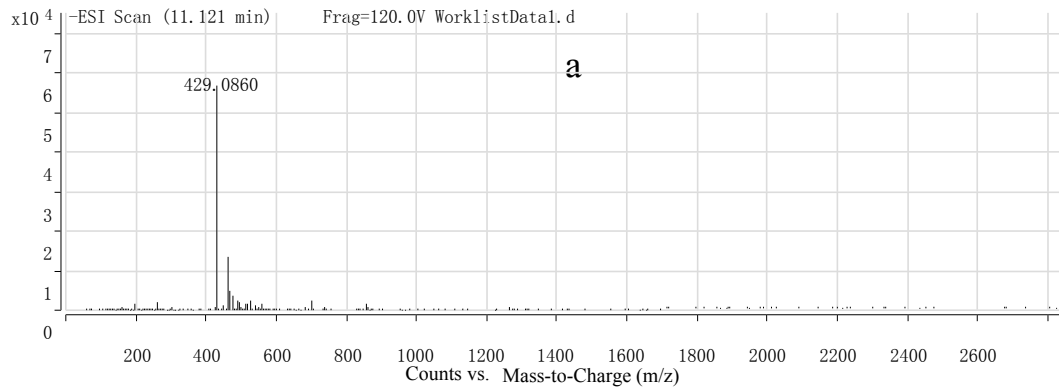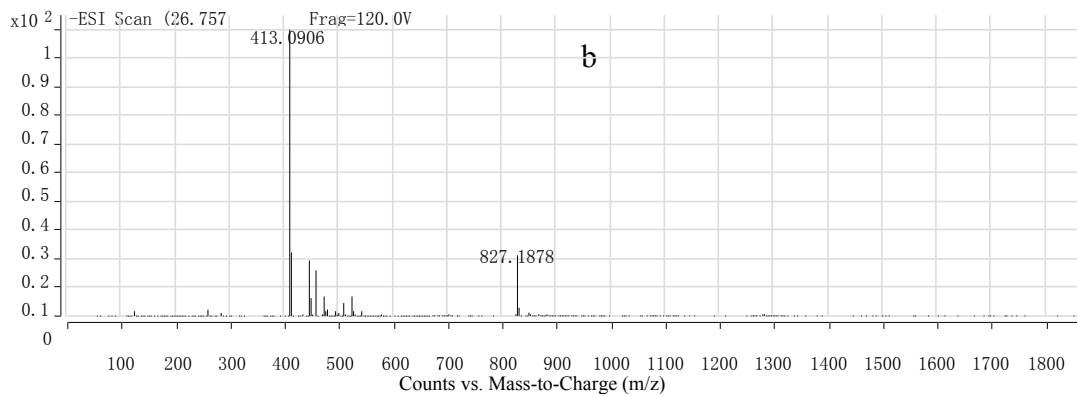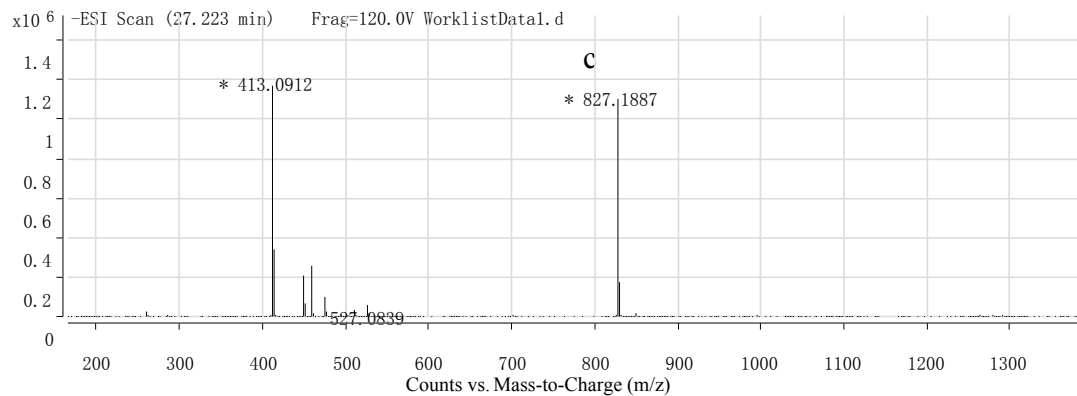

x10<sup>6</sup> -ESI Scan (40.767 min) Frag=120.0V WorklistData1.d **d**

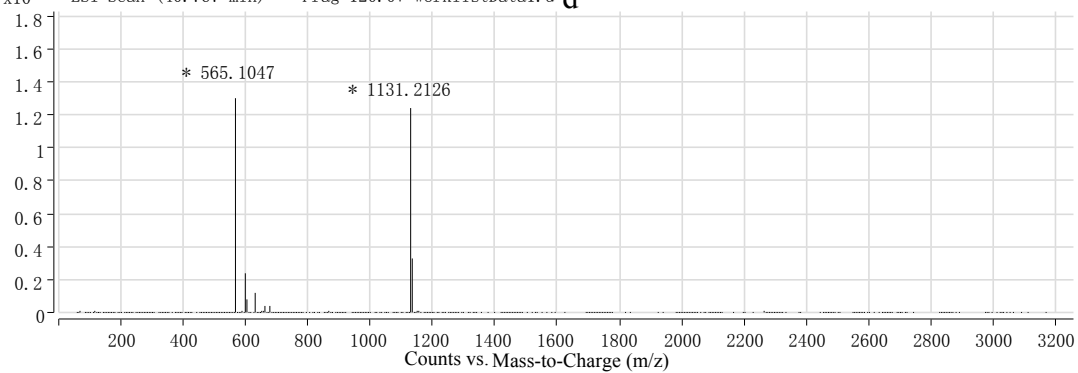

Supplement: c5fo00939a1.pdf [file c5fo00939a1.pdf]
